# Supplementary material
Source: Research Square preprint supplement (doi:10.21203/rs.3.rs-9379510/v1)
Supplement: Supplementary file 1 [file 4481dfd89712b61d7ad0e175.xlsx]

## Sheet: Sheet1
		initial conc(mg/ml)	final conc (mg/ml)	abs1	abs2	abs3	mean
	Quercetin	1	0.2777	0.582	0.574	0.589	0.581667									slope	7.7334
		0.5	0.13885	0.564	0.559	0.573	0.565333									intercept	0.0502
		0.25	0.069425	0.463	0.465	0.454	0.460667
		0.125	0.0347125	0.296	0.294	0.291	0.293667
		0.0625	0.0173563	0.182	0.183	0.188	0.184333
		0.03125	0.00867813	0.114	0.121	0.113	0.116
		0.015625	0.00433906	0.083	0.09	0.086	0.0863333
		0.0078125	0.00216953	0.064	0.063	0.073	0.0666667
		0.00390625	0.00108477	0.06	0.061	0.062	0.061
		0.00195312	0.000542383	0.052	0.048	0.053	0.051
				ABS 1	ABS 2	ABS 3	MEAN	CON 1	CON 2	CON 3	CONC 1	CONC 2	CONC 3	MEAN	SD	SEM
	EXTRACT	0.25	0.069425	0.1168	0.1056	0.1058	0.1094	0.00861199	0.00716373	0.00718959	12.4047	10.3187	10.3559	11.0264	1.19379	0.689236
		0.125	0.0347125	0.0563	0.0597	0.057	0.0576667	0.000788786	0.00122844	0.000879303	1.40104	3.53889	2.5331	2.49101	1.06955	0.617503
		0.0625	0.0173563	0.0331	0.0359	0.0394	0.0361333	-0.00221119	-0.00184912	-0.00139654
		0.03125	0.00867813	0.0201	0.0231	0.0274	0.0235333	-0.00389221	-0.00389221	-0.00294825
		0.015625	0.00433906	0.0092	0.01	0.0011	0.00676667	-0.00530168	-0.00519823	-0.00634908

## Sheet: Sheet2
	initial conc(mg/ml)	final conc (mg/ml)	abs1	abs2	abs3	mean
Gallic Acid	0.25	0.025	2.248	2.255	2.253	2.252
	0.125	0.0125	1.381	1.383	1.382	1.382
	0.0625	0.00625	0.9	0.898	0.899	0.899									SLOPE	122.72
	0.03125	0.003125	0.515	0.515	0.512	0.514									INTERCEPT	0.1405
	0.015625	0.0015625	0.387	0.389	0.385	0.387
	0.0078125	0.00078125	0.242	0.235	0.237	0.238
	0.00390625	0.000390625	0.192	0.193	0.191	0.192
	0.00195312	0.000195313	0.154	0.157	0.157	0.156
	0.000976562	9.76563e-05	0.14	0.144	0.139	0.141
	0.000488281	4.88281e-05	0.125	0.126	0.124	0.125
			ABS 1	ABS 2	ABS 3	MEAN	CON 1	CON 2	CON 3	CONC 1	CONC 2	CONC 3	MEAN	SD	SEM
EXTRACT	0.25	0.025	0.3078	0.3074	0.308	0.307733	0.00136327	0.00136001	0.0013649	5.45306	5.44003	10.9192	7.27075	3.15963	1.82421
	0.125	0.0125	0.1703	0.1701	0.1703	0.170233	0.000242829	0.000241199	0.000242829	1.94263	1.94263	1.94263	1.94263	2.71948e-16	1.57009e-16
	0.0625	0.00625	0.099	0.099	0.0983	0.0987667	-0.000338168	-0.000338168	-0.000338168
	0.03125	0.003125	0.0641	0.0643	0.0643	0.0642333	-0.000622555	-0.000622555	-0.000620926
	0.015625	0.0015625	0.0708	0.0705	0.0707	0.0706667	-0.00056796	-0.000570404	-0.000568774
